# Supplementary material
Source: Research Square preprint supplement (doi:10.21203/rs.3.rs-9390347/v1)
Supplement: Supplementary file 1 [file 006a02b298142fe912972f1d.xlsx]

## Sheet: Supplemental_Table_3
Table S3: Detailed results, by cohort, of regression analyses of functional outcome showing the -log10(p-value) for each predictor. Wave 1 sites are indicated by an asterisk.
SITE	* FACE-BD	* MICHIGAN	* PROMPT	* CRIB	* UBC	* Barcelona	* LITMUS	* CHOICE	* Mayo	* ISMMS/BWH	* Deakin	* GAGE-BD	* Oslo	Tauli	COFAMS	Cagliari	UTHealth	BDRN	COGSBD	FUP	BIPOGENT-IPM	BCOS	FOR2107	ATLADIS	GAIN	NIMHANS	DDBC	DOBi	GBP	NeuroGAP	UNSW	IGP	BIPLONG	MadManic	SelcukU	FIDMAG	GREAT	Maritime
Number of Participants	1547	553	66	69	83	104	281	445	1908	220	129	212	265	60	80	271	326	2042	89	1972	68	240	148	275	1918	390	73	106/227	1598/5598	615	223	74	222	124	145	238	501
LEVEL ONE MEASURES	---	---	---	---	---	---	---	---	---	---	---	---	---	---	---	---	---	---	---	---	---	---	---	---	---	---	---	---	---	---	---	---	---	---	---	---	---	---
Age	0.195179	0.0362122	0.19382	0.548214	0.126098	0.279841	0.486782	0.047692	5.84717	0.356547	0.20621	0.37366	0.298432	0.732828	0.232102	2.92082	1.75696	4.6989	0.230623	13.133	0.160522		0.465974	0.111821	10.0063	1.56864	1.5191	0.256081	20.8996	14.4763	3.96671	0.154282	0.415669	0.651695	5.68288	0.146302	0.12988	0.27
Sex	0.229148	0.251812	0.809668	2.1549	0.732828	0.105684	0.252588	0.756962	2.30103	0.255707	0.383	0.0685421	0.179799	0.289883	0.473661	0.760951	0.365019	0.435334	0.69037	0.336998	1.19382		0.197226	0.462181	2.52375	0.0371573	0.315367	0.22093	0.386158	2.04576	0.0525663	2.22185	0.219683	0.412289	0.0864644	1.1549	0.374488	1.14
Race		0.823909	0.213249		0.225483		0.258848	0.218245		0.394695			0.853872	0.0990869	0.267606		1.04144	0.625252		0.0717417					0.376826		0.127112		0.107905	0.987163	0.0218195		0	0				0.17
Education level	0.798603	1.69897	0.390406	0.159894	0.390406	0.273273	0.661544	0.153045	4.84952	0.0347983	0.091515	0.206908	1.13668			0.26817	8.08574	17.0189	0.0136762	1.08888	1.06048		2.30103	2.1549	6.62345	0.496209	0.596545		0.0409586	0.127261		1.36653	0.0846002		2.91447		0.493549
LEVEL TWO MEASURES	---	---	---	---	---	---	---	---	---	---	---	---	---	---	---	---	---	---	---	---	---	---	---	---	---	---	---	---	---	---	---	---	---	---	---	---	---	---
BD subtype	1.92082	0.327902	1.45593	0.0550241		0.609065	0.943095	0.25649	1.10791	0.279014	0.0277972	0.158641	0.954677			0.0394341	0.95546	0.0338583	0.131944				0.779892	0.545155			0.876763	0.384177	0.421361		0.048177		0.216811	0.177178	0.62983		0.508975	1.06
Psychosis Hx	0.634512	0.337242	0.103474	0.767004	1.3279	1.67778	0.954677	0.0362122	0.0665127	0.323306			1.92082	1.0655	0.0510982	0.109579	0.0815503	0.782516	0.793174		0.596879		1.00877	0.0639892	0.523835	0.0899095	0.0721017	0.14388	0.329754	0.0670192	0.218245	0.131356	0.317855	1.30103	0.0216637		0.220071	1.56
Current depression	43.1451	2	3.12586	1.79588	0.471083	3.28713	19.4126	13.2417		1.60206	0.000869459	6.55007	6.59309	0.562249		14.7316	0.164056	9.88129	2.69897				2.69897	1.74473		0.130182	3.57512	1.79348			2.80278	2.30103	1.92082	5.36874	0.535978	12.8889	2.87877
Current Mania	0.0371573	0.853872		0.383	0.255707	0.115205	0.50724	0.415669		1.14874	0.718967	0.756962	1.25964			2.58503	1.12668	0.718967	1.37675				1.58503	0.0305841		0.235077	0.590096	0.299418			0.154902	1.63827	0.416801	0.262013	0.968421	12.4291
Age at onset depression		0.508638						0.239578		0.374688					1			0.37059							0.227491						0.184422		0.90309
Age at onset mania	0.254145	0.39794						0.2652		0.079355		0.189767	0.0385789		1.07572			0.607303							0.538236	1.63827			0.856985		2.79523		0.0186345				0.925053	0.06
Number of prior manias	2.22185	0.0315171				0.614394		0.302771		0.331614	1.20066		0.326979											0.0177288
Number of prior depressions	0.5867	0.267606	0.107349			1.95861		0.142668		1.34679	0.443697		0.17134											0.511449
Number of total episodes				0.115205	0.777284										1.01323	0.929224		0.946922					0.120331		3.44719	1.60206		0.280961	0.261219				0.866461	0.0127808	1.61085		1.0567	1.24
Number of hospitalizations																0.783043		13.6837		0.0938736	0.115205			1.07058	7.63084	1.52288					0.928118			0.514279	0.343886
Number of suicide attempts																0.836839		1.04096		0.604864	0.604864			1.88606	3.40607								0.139662	1.284			0.176187
Comorbid substance dx	1.23657	0.522879					0.844664	0.0746879	0.131944	0.160522	0.114074		1.95861			0.232993		3.46363		7.69897	7.69897			0.453457	0.275341	0.0840728			1.60206	0.340084			0.688246					0.06
Comorbid anxiety dx	1.55284	0.119186					0.0209071	1.02687	1.05061	0.294136						0.128777	0.320572	2.69897		0.120195	0.120195			0.970616	0.149383	0.501689			0.754487									1.58
LEVEL THREE MEASURES	---	---	---	---	---	---	---	---	---	---	---	---	---	---	---	---	---	---	---	---	---	---	---	---	---	---	---	---	---	---	---	---	---	---	---	---	---	---
Global cognition	3	0.853872			0.137272	0.896196				0.761954			0.90309	1.02687					0.232102									0.140015								3.74262
Premorbid IQ	0.596879	0.00436481			0.0705811	0.0123337				0.0423927									0.322393													0.548214	1.27572			0.886057
MEDICATIONS	---	---	---	---	---	---	---	---	---	---	---	---	---	---	---	---	---	---	---	---	---	---	---	---	---	---	---	---	---	---	---	---	---	---	---	---	---	---
No medication																	0.0197693		0.544404	0.544404			1.38722	0.000434512					2.3098		1.18709		0.116339
Lithium	0.438899	0.443697						0.598599	0.00392635	0.0433514			1.09691			0.941954	1.16115	0.122629	4.06444	4.06444			1.92082	1.10791		0.0163737			1.92082		1.34679		0.67162	1.16115	0.399499	0.793174
Anticonvulsants	0.0467237	0.346787					0.567031	1.17393		0.677781			1.27572			0.245499	0.193549		0.0941336	0.0941336			1.3279	0.314258		7.35551			0.974694		0.485452		0.730487		0.836337	0.274088
Antidepressants	0.0190881	0.677781					0.744727	0.116907	0.118045	0.106238			0.254925			0.680894	0.336582		1.78737	1.78737			2.39794	2.69897					0.415669		1.00877		0.917215			0.156767
Antipsychotics	0.222573	2					2.04576	0.000869459	0.576754	0.353596			2.30103			0.345438	1.1831		2.17776	2.17776			1.05061	0.879426		0.4698			0.492144		2.15563		0.180456		0.220974	0.380907
Total # psychotropic medicines	1.49485	0.0809219				0.161151	1.76955	0.481486	0.707744	0.119186						0.0692547			0.0462988	0.0462988	0.721246		2.30103	1.284		0.669586			0.217527		0.28735		0.477556	0.359519
* See Burdick et al, 2022; PMID: 35322518
