# Supplementary material
Source: Research Square preprint supplement (doi:10.21203/rs.3.rs-9390347/v1)
Supplement: Supplementary file 1 [file 36cdc49a4876509a181d65c2.docx]

Supplemental Information

Supplemental Information: Author Affiliations and Acknowledgments

Supplementary Methods 1. Regression Instructions

Supplementary Methods 2. Questions included in Global survey.

Supplemental Table 1: Summary of Cohort Details

Supplemental Table 2: Summary of respondents

Supplemental Table 3: Detailed results, by cohort, of regression analyses of functional outcome

Supplemental Table 4: Detailed results, by cohort, of regression analyses of functional outcome showing the rank of p-value for each predictor

Supplementary Methods 1. Regression Instructions

***Synopsis****: Functional impairment is common in BD and is influenced by a number of demographic, clinical, and cognitive features. The goal of this project is to measure the influence of key factors on community function in multiple cohorts of well-characterized BD patients from around the world.*

What sites need to do:

1. **Define ‘good’ vs ‘bad’ functioning**

Identify how you will define good versus bad functioning – this is kept purposefully coarse in its definition. Some projects will have WHODAS/Sheehan/Social Adjustment Scale/FAST etc. Others may only have employed vs unemployed, married vs unmarried or some other indicator. If the site PI feels it can be reliably estimated, use that.

If your site has more than one functional outcome measure, as a general rule of thumb, use the one with: 1) the most complete data, 2) the most detailed assessment (e.g. FAST instead of GAF), and 3) the most overlap with other sites. The below figure summarises the most frequent outcome measures, as per the GBC survey responses we received.

- 1. Considerations – use z-scores to split sample, or use *a priori* ‘good’ and ‘bad’ cutoff. Please code ‘good’ as zero (0), and ‘bad’ as one (1).
  2. For married vs unmarried, there is the issue of dealing with widowed status. Please include widowed as missing, or potentially (formerly) married.
  3. For employed vs unemployed, there is the issue of dealing with retired status. How this is dealt with will somewhat depend on the demographics of your sample, and the typical or fixed retirement age in your country.** For example, if BD cases retired “early” they could be considered within the “unemployed” group, whereas BD cases who retired at or after your country-specific retirement age (e.g. 65 years) could be considered within the “employed” group.

**For a summary of retirement ages by country/region, please refer to this [wiki](https://en.wikipedia.org/wiki/Retirement_age) (with variably current data for n>100 countries) or this [link](https://topforeignstocks.com/2021/03/22/retirement-ages-by-country-2021-chart/tocks.com) (for 2021 data for n=38 countries/regions).

1. **Create a sample characteristics summary table**

Create a summary table as follows to describe the cohort that you intend to include in analyses (an excel template is found in SupplementalAppendixTables.xlsx).

Once this table is completed for your cohort, please send it to [**j.fullerton@neura.edu.au**](mailto:j.fullerton@neura.edu.au)and [**gbcasiapacific@gmail.com**](mailto:gbcasiapacific@gmail.com) to enable us to assist in the selection of appropriate variables for inclusion in the regression analysis.

1. **Conduct a logistic regression to predict good versus bad global functioning**

See detailed instructions for logistic regression on page 4. We recommend that you include any LEVEL ONE, LEVEL TWO &/or LEVEL THREE measures that you have at your site (those indicated with * in the table above represent ‘core’ independent variables) and enter in the order above. Report all model-level and predictor-level results.

**Derive general cognitive ability measure**

See detailed instructions on page 6. Any site that has cognitive data will derive ‘*g*’ using an unrotated PCA with up to two representative measures per cognitive domain (be aware of power here – 10 subjects per variable included on average). *g* can be reliably derived with only 3 measures provided that they measure different domains. If you have a global measure only (e.g. IQ) – this can be substituted but not ideal. Do not include premorbid estimates of IQ when calculating *g*.

*g* will be included for any site that has it, as will premorbid IQ – it is NOT necessary to have cognitive data to do this project – anyone without these LEVEL THREE measures will report only on the demographic and ‘illness features’ above.

The results will not be *directly* combined – so it is ok to have different predictors/definitions of outcome etc. We will report the consistencies across samples and where differences exist by cohort.

This will not require meta-analyses, rather it will be a multiple cohort replication and expansion type of approach. We anticipate this will be compelling due to the world-wide collaboration and the (hopefully) consistent findings around some of the factors we look at. Of course, the data will drive this, so we shall see…

**Detailed instructions for analysis – Functional Outcomes Project**

**Step 1. In preparation for your logistic regression, please**

1. Code dichotomous variables as 0 or 1 (yes) to allow for uniform interpretation of results.
2. Label your variables in a human readable, clear, interpretable way, and in English.
3. If possible, include a data dictionary with your results file.
4. Please include a description for how you dichotomized your functional outcome measure.
5. If you are including cognitive data, derive *g,* as instructed on page 6 below.

**Step 2. Regression**

In whatever statistical program you are most comfortable, run a **logistic regression using the “enter” method** (please do not specify order or perform stepwise removal of variables). Be aware of power and the variability of your measures – 10 subjects per variable included on average. So if your sample size is 100, include a maximum of 10 independent variables.

The dependent variable will be the functional outcome measure/s that you have for your cohort [e.g. Functioning Assessment Short Test (FAST), World Health Organisation Disability Assessment Scale (WHODAS), Sheehan Disability Scale (SDS), Social Adjustment Scale (SAS), Global Assessment of Functioning (GAF), employment status, marital status].

The independent variables** will be specific to those available at your site and may include: age, sex, race, education, BD subtype, psychosis hx, current depression, current mania, # prior manias, # prior depressions, age onset depression, age onset mania, comorbid substance use disorder (SUD), comorbid anxiety, general cognitive ability (*g*), premorbid IQ, medication (by class), total medication load. Please include all available LEVEL ONE measures, and LEVEL TWO and/or LEVEL THREE measures as appropriate to availability, reliability and your sample size.

Medication classes (6) include:

1. None
2. Lithium
3. Anti-convulsants (e.g. valproic acid; carbamazepine; lamotrigine)
4. Anti-depressants (e.g. SSRIs; SNRIs; atypical antiDs; tricyclic antiDs; MAOIs)
5. Anti-psychotics (e.g. aripiprazole; clozapine; olanzapine; quetiapine; risperidone)
6. Polypharmacy (i.e. two or more of the above medication classes, of the same or different kind; e.g. two antipsychotics; or antipsychotic+convulsant)

A list of medicines is available on the “MedicationClasses” tab of the SupplementalAppendixTables.xlsx.

****Note – in samples with limited n, we can consider calculating a single measure of ‘illness burden’ which might simultaneously account for duration of illness and # episodes (calculated by average episodes per year of illness).**

*Contact Jan Fullerton and the GBC team (*[*j.fullerton@neura.edu.au*](mailto:j.fullerton@neura.edu.au)*;* [*gbcasiapacific@gmail.com*](mailto:gbcasiapacific@gmail.com)*) if you have any questions/concerns.*

**Step 3.** **Results**

Once complete, please **save output files as a PDF** so that we can open them regardless of the program you used to conduct the regression.

Please ensure that the following ‘results’ metrics are included in your output, as these will be reported in the paper:

***For the overall regression model***, include:

1. **Omnibus Chi-square**
2. **Omnibus P-value**
3. **Percentages correct** for predicting good versus bad outcome (there should be 3 of these values
   1. value for predicting good outcome,
   2. value for predicting bad outcome, and
   3. a combined value discriminating between good and bad outcome.

In addition, for ***each of the independent variables entered***, please report the following:

1. **Beta**
2. **Standard error**
3. **Wald**
4. **Degrees of freedom**
5. **p-value***
6. **95% CIs**

* if your statistical program does not output independent variable p-values (e.g. SAS) you may need to write your own contrasts to obtain p-values. Please contact us if you need assistance.

Please note that the demographic characteristics summary table will likely need to be regenerated at this point to describe the *exact sample* that was included in the regression analysis. This is because sample size or characteristics may change with selection of functional outcome measures and when accounting for missing data or participant exclusions.

**Please return your completed output, demographic and clinical descriptive tables (using the templates provided) to** [**j.fullerton@neura.edu.au**](mailto:j.fullerton@neura.edu.au) **and** [**gbcasiapacific@gmail.com**](mailto:gbcasiapacific@gmail.com)

***Instructions on calculating general cognitive ability (g)***:

1. Note – the total number of variables included in the principal components analysis (PCA) should NOT exceed the 10:1 ratio rule (10 participants per one variable). Thus, if your sample size is 150, no more than 15 variables should be included in the PCA.
2. Select one or more tests within a purported ‘domain’ as most representative of that domain (can include more than one test per domain – e.g. ‘attention’, if available and there’s no risk of violating #1 above)
   1. NB: if you are at risk of violating #1 above, select the “best” or most representative item level variable from each test to be included (only one per test)
3. Z-score all of the variables that will be included – ***within the BD sample used in this study****.*
4. The z-score calculation is as follows:

**z = (x-μ)/σ, where**

x is the raw score of the individual patient,

μ is the population mean (in this case the mean of the full BD sample), and

σ is the population standard deviation.

This should result in a z-score being *assigned to each patient individually* (so that each patient’s raw score is compared with the full sample’s mean score to derive a z score for each individual). Then, when you calculate the mean of that new z-score variable, it should be 0 and SD should =1.

1. Run a PCA with parameters set for “no rotation” or unrotated, and Eigenvalues > 1.0.
2. Your output should look like the example provided above.

*Sanity check* – the first “component” is the g-factor and should account for around 40-50% of the variance explained. When viewing the factor loadings, ALL of the individual measures should load substantially onto the first component (somewhere around .35 or greater – as an absolute value, negative values are possible).

1. Importantly, you need to ‘save scores’ when running the PCA, such that each patient will be assigned a value for Component 1, Component 2 and so on. We only care about Component 1, which is the individual’s g-factor. The g-factor is represented as a z-score so again, the mean of the population g-factors should be around 0 with SD~1.0

Supplementary Methods 2. Questions included in Global survey.

| Items | <<SELECTION OPTIONS>> |
| --- | --- |
| Question 1: Are you willing to contribute to the Global Bipolar Cohort collaborative effort? | - Yes - No - Maybe |
| Question 2: Principal investigator: name | (Open text) |
| Question 3: Principal investigator: primary institution | (Open text) |
| Question 4: Principal investigator: email address | (Open text) |
| Question 5: What is the cohort name? | (Open text) |
| Question 6: If published, please provide the citation of the primary paper describing this cohort (respond with “NA” if not published).  Format can be pubmed identifier (PMID, PMCID) or full citation. | (Open text) |
| Question 7: Names of additional key investigators relating to this cohort (please also provide email addresses and institutions, if possible).  Please use the following format: First Name, Last Name, Email, Institution | (Open text) |
| Question 8: If there is a data custodian who can receive direct communications in regards to this data requests/analysis for this cohort, please provide their name and email address with the following format: First Name, Last Name, Email, Institution | (Open text) |
| Question 9: From what population were participants largely recruited? Select all that apply.  <<SELECTIONS>> | - community dwelling - specialised clinic - primary hospital inpatients/outpatients - tertiary referral service - other |
| Question 10: What is your functional outcome measure? Please select all measures of functioning that you collect, or specify others that are not listed below.  <<SELECTIONS>> | - World Health Organization Disability Assessment Scale (WHODAS) - Sheehan Disability Scale (SDS) - Social Adjustment Scale (SAS) - Functioning Assessment Short Test (FAST) - Employment status - Marital status - None of the above - Other (please provide details below) |
| Question 11: Description of other functional outcome measure | (Open text) |
| Question 12: For how many patients do you have data for this functional measure? Please be exact as possible. | (Open text) |
| Question 13: What tool do you use for diagnosis? Please select all measures that you collect, or specify others that are not listed below. Select all that apply.  <<SELECTIONS>> | - SCID - DIGS - MINI - Clinical only - Other (please specify below) |
| Question 14: Description of other diagnostic instrument employed | (Open text) |
| Question 15: Which mood ratings do you have on these patients (HDRS; MDRS; self-report; YMRS etc)? Select all that apply.  <<SELECTIONS>> | - Hamilton Depression Rating Scale (HDRS) - Montgomery-Asberg Depression Rating Scale (MADRS) - Young Mania Rating Scale (YMRS) - Self-report - Other (please specify below) |
| Question 16: Description of other mood rating instrument employed | (Open text) |
| Question 17: Do you have biostatistical support &amp;/or capacity to conduct analyses in your data (e.g. a logistic regression to predict good versus bad global functioning)? <<SELECTIONS>> | - Yes - No |
| Question 18: If you have a data manager who can be contacted directly in regards to data or analysis requests, please provide their name and email address below: | (Open text) |
| Question 19: Do you have biological samples for some or all of this cohort? Select all that apply. <<CHECKBOX SELECTIONS>> | - Blood samples - Immortilised cell lines (EBV) - Serum/plasma - Extracted DNA - Genome-wide genotype data - None - Other (please specify) |
| Question 20: Do you have cognitive data on some or all of these subjects? If so, do you have at least 3 tests that measure different cognitive domains? <<SELECTIONS>> | - Yes - all participants - Yes - subset - No |
| Question 21: Description of cognitive instruments employed, domains captured and proportion of participants with data | (Open text) |
| Question 22: In regards to pharmaceutical treatments, have you collected data on medication use for some or all participants? Please indicate the types of medications used by cohort participants. <<SELECTIONS>> | - Lithium - Anti-depressants (SSRIs, SNRIs, atypical antidepressants, tricyclic antidepressants, MAOIs) - Anti-convulsants (e.g. valproic acid; carbamazepine; lamotrigine) - Anti-psychotics (e.g. aripiprazole; clozapine; olanzapine; quetiapine; risperidone; ziprasidone) - Polypharmacy (e.g. two antipsychotics; antipsychotic+convulsant) - Medication data not collected |
| Question 23: If you have data on the number or % of participants treated with the above medication classes, &amp;/or timing of treatment, please specify details here: | (Open text) |
| Question 24: What is the predominant ethnicity of cohort participants? Select all that apply. <<SELECTIONS>> | - EAST ASIAN ANCESTRY (select sub-category below, if known) [Burmese, Cambodian, Dia Chinese, Han Chinese, Japanese, Korean, Taiwanese, Thai, Vietnamese] - SOUTH ASIAN ANCESTRY (select sub-category below, if known) [Bangladeshi, Bengali, Indian, Pakistani, Sri Lankan, Tamil, Telugu] - EUROPEAN ANCESTRY (select sub-category below, if known) [British, Finnish, Iberian/Spanish, Toascani/Italian, Northern & Western European, Eastern European] - AFRICAN ANCESTRY (select sub-category below, if known) [African Ancestry SW, African Caribbean, Esan, Gambian, Luhya, Mende, Yoruba] - AMERICAN ANCESTRY (select sub-category below, if known) [Colombian, Mexican, Peruvian, Puerto Rican] - DATA NOT COLLECTED (or not legislatively possible to share information) - OTHER |
| Question 25: The following three questions are for a separate study of longitudinal functional trajectories, led by Marion Leboyer, University of Paris. Please complete these following responses only if you have longitudinal data for this cohort, noting that responses to the following questions are not required to participate in the primary GBC functional outcomes study. <<SELECTIONS>> | - Yes, I have longitudinal data for some or all of the study participants - No, I have no longitudinal data for study participants |
| Question 26: How many time points do you have for functional outcome measures? <<SELECTIONS>> | - 1 - 2 - 3 - 4 - 5 or more |
| Question 27: What is the approximate frequency of longitudinal measurements? <<SELECTIONS>> | - Monthly - Semi-annually (i.e. every 6 months) - Annually - Bi-annually (i.e. every 2 years) - Realtime monitoring (e.g. smartphone app) - Other |
| Question 28: What is the sample size for this longitudinal data? | (Open text) |
