# Supplementary material
Source: Research Square preprint supplement (doi:10.21203/rs.3.rs-9390347/v1)
Supplement: Supplementary file 2 [file 0ca248a80fd7f2915c638cdd.xlsx]

## Sheet: Supplemental_Table_4
Table S4: Detailed results, by cohort, of regression analyses of functional outcome showing the rank of p-value for each predictor. Wave 1 sites are indicated by an asterisk.
SITE	* FACE-BD	* MICHIGAN	* PROMPT	* CRIB	* UBC	* Barcelona	* LITMUS	* CHOICE	* Mayo	* ISMMS/BWH	* Deakin	* GAGE-BD	* Oslo	COFAMS	Unimelb	NIMHANS	DOBi	IGP	BIPLONG	SelcukU	FIDMAG	FOR2107	MadManic	GAIN	Tauli	Cagliari	BIPOGENET-IPM	DDBC	UTHealth	BDRN	ATLADIS	UNSW	Maritime	FUP	GBP	NeuroGAP	GREAT	BCOGS
Number of Participants	1547	553	66	69	83	104	281	445	1908	220	129	212	265	80	89	390	106/227	74	222	145	238	148	124	1918	60	271	68	73	326	2042	275	223	278	1972	1598/5598	615	501	240
LEVEL ONE MEASURES	---	---	---	---	---	---	---	---	---	---	---	---	---	---	---	---	---	---	---	---	---	---	---	---	---	---	---	---	---	---	---	---	---	---	---	---	---	---
*Age	16	19	6	4	9	7	11	17	1	8	5	3	13	6	7	4	5	6	11	1	10	12	6	1	3	2	5	2	3	4	15	1	6	1	1	1	12
*Sex	14	16	3	1	3	11	13	4	2	14	4	7	15	4	4	14	6	2	13	11	4	13	8	6	5	8	1	6	9	13	12	14	4	9	11	2	9
*Race		6	5		7		12	12		6			11	5					20				12	7	6			9	2	11		16	7	13	15	3
*Education level	8	3	4	6	5	8	8	13		21	7	4	7		9	8		4	18	2		3		3		11	2	4	1	1	2			5	16	5	8
LEVEL TWO MEASURES	---	---	---	---	---	---	---	---	---	---	---	---	---	---	---	---	---	---	---	---	---	---	---	---	---	---	---	---	---	---	---	---	---	---	---	---	---	---
*BD subtype	4	14	2	8		6	5	10	3	13	8	6	9		8		2		14	6		11	5			17		3	4	16	10	15	5		9		7
*Psychosis Hx	9	13	8	3	1	3	4	18	9	11			4	7	3	12	7	7	12	12		10	2	9	1	15	4	10	13	9	16	11	2		12	6	10
*Current depression	1	1	1	2	4	1	1	1		1	9	1	1		1	11	1	1	1	7	1	1	1		4	1		1	8	3	4	2					1
*Current Mania	18	4		5	6	10	10	7		3	2	2	6		2	10	3	3	10	4	2	6	10			3		5	7	10	17	13
Age at onset depression		9						11		7				3					4					13						14		12
Age at onset mania	13	11						9		18		5	17	1		2			19					8						12		3	9		6		4
# prior manias	3	20				5		8		10	1		12																		18
#prior depressions	11	15	7			2		14		2	3		16																		11
*# total episodes				7	2									2		3	4		5	3		14	11	4		5				8			3		13		3
#hospitalizations																5				9			7	2		7	6			2	7	8		12
#suicide attempts																			16				3	5		6	8			7	3			7			11
Comorbid substance dx	7	8					6	16	7	15	6		3			13			7					12		13	2			5	13		8	2	4	4
Comorbid anxiety dx	5	17					14	3	4	12						7								14		14	12		11	6	8		1	10	7
LEVEL THREE MEASURES	---	---	---	---	---	---	---	---	---	---	---	---	---	---	---	---	---	---	---	---	---	---	---	---	---	---	---	---	---	---	---	---	---	---	---	---	---	---
Global cognition	2	4			8	4				4			10		6		8				3				2
Premorbid IQ	10	21			10	12				20					5			5	2		5
MEDICATIONS	---	---	---	---	---	---	---	---	---	---	---	---	---	---	---	---	---	---	---	---	---	---	---	---	---	---	---	---	---	---	---	---	---	---	---	---	---	---
															9				17			7							14		19	6		8	2
Lithium	12	10						5	10	19			8		3	15			8	8	6	5	4			4			6	15	6	5		3	3
Anticonvulsants	17	12					9	2		5			5		13	1			6	5	8	8				12			12		14	9		11	5
Antidepressants	19	7					7	15	8	17			14		5				3		9	2				9			10		1	7		6	10
Antipsychotics	15	1					2	19	6	9			2		4	9			15	10	7	9				10			5		9	4		4	8
Total # psychotropic medicines	6	18				9	3	6	5	16					16	6			9			4	9			16	3				5	10		14	14
	5	3	11	11	9	8	9	5	13	3	10	12	6	12	10	8	11	12	5	10	13	11	9	7	13	7	11	11	10	4	6	9	10	11	9	13	10	19
	14	16	8	8	10	11	10	14	6	16	9	7	13	7	9	11	8	7	14	9	6	8	10	12	6	12	8	8	9	15	13	10	9	8	10	6	9	0
meds	1	1				1	1	1	1	1			1		1	1			1	1	1	1	1			1	1		1	1	1	1		1	1
	15	17	8	8	10	12	11	15	7	17	9	7	14	7	10	12	8	7	15	10	7	9	11	12	6	13	9	8	10	16	14	11	9	9	11	6	9	0
	5	5	0	0	0	1	4	5	4	5	0	0	4	0	6	4	0	0	6	3	4	6	2	0	0	5	1	0	5	1	6	6	0	6	6	0	0	0
	19	21	8	8	10	12	14	19	10	21	9	7	17	7	15	15	8	7	20	12	10	14	12	12	6	17	9	8	14	16	19	16	9	14	16	6	9	0
* See Burdick et al, 2022; PMID: 35322518
