# Supplementary material
Source: Research Square preprint supplement (doi:10.21203/rs.3.rs-9390347/v1)
Supplement: Supplementary file 4 [file 81c0d5172316de05772b1678.xlsx]

## Sheet: Supplemental_Table_1
Principal investigator (PI)	PI: primary institution	PI: email address	cohort name	Publications	Recruitment population	functional outcome measure		patient data (n) functional measures	Diagnostic Tools	Primary Mood Ratings	Other mood rating	Cognitive data	Medication data	ethnicity	Longitudinal Data	Time Points
Po-Hsiu Kuo	National Taiwan University, Taiwan	phkuo@ntu.edu.tw	GREAT (Genomic Research and Epidemiological Studies for Affective Disorders in Taiwan)	PMID: 21906818; 29141103	primary hospital inpatients/outpatients	Employment status,Marital status,Sheehan Disability Scale (SDS),World Health Organization Disability Assessment Scale (WHODAS)		900	Other	HDRS, YMRS, S-R		Yes - subset	Comprehensive	East Asian Ancestry: Taiwanese	Yes	2
Miguel Prieto	Universidad de los Andes, Chile	mprieto@uandes.cl	NA	N/A	primary hospital inpatients/outpatients,specialised clinic,tertiary referral service	Employment status,Functioning Assessment Short Test (FAST),Marital status		130	SCID	other	BISS	Yes - subset	Comprehensive	American Ancestry: Hispanic	No
Kürşat Altinbas	Selcuk University Faculty of Medicine, Turkey	kursataltinbas@gmail.com	SelcukU	N/A	primary hospital inpatients/outpatients,specialised clinic,tertiary referral service	World Health Organization Disability Assessment Scale (WHODAS)		340	SCID	HDRS, YMRS, S-R	CGI-BP, UKU, GAS	Yes - subset	Comprehensive	European Ancestry	Yes	>5
Tilo Kircher	University of Marburg, Germany	kircher2@staff.uni-marburg.de	FOR2107 MACS	PMID: 30267149	primary hospital inpatients/outpatients,Flyer, Newspaper, Advertisement, cooperating psychiatric services	Employment status,FAST,Marital status,WHODAS			SCID	HDRS, YMRS, S-R		Yes - all participants	Comprehensive	European Ancestry: Northern and Western European	Yes	3
Humberto Nicolini	Carracci Medical Group, Mexico	josehnicolini@gmail.com	Bipolar Mexican and Central American Study study	PMID: 31033179 Am J Med Genet B Neuropsychiatr Genet. 2019 Feb 19. doi: 10.1002/ajmg.b.32715.	primary hospital inpatients/outpatients,specialised clinic	Employment status,Marital status,Sheehan Disability Scale (SDS)		500	DIGS	other		Yes - subset	Polypharmacy (e.g. two antipsychotics; antipsychotic+convulsant)	American Ancestry: Mexican	No	1
Christian Simhandl	Sigmund Freud PrivatUniversity Vienna	psychiatrie@simhandl.at	Neunkirchen 500	PMID: 24717379	primary hospital inpatients/outpatients	Employment status,Marital status,None of the above		300	Clinical only	S-R, other		No	Comprehensive	European	Yes	2
Mirko Manchia	University of Cagliari, Cagliari, Italy	mirkomanchia@unica.it	CAGLIARI Cohort	PMID: 31814040	community dwelling,specialised clinic	Functioning Assessment Short Test (FAST),Social Adjustment Scale (SAS)		200	SCID	HDRS, YMRS		Yes - all participants	Comprehensive	European Ancestry: Toscani/Italian	Yes	2
Maria Grigoroiu-Serbanescu	Alexandru Obregia Clinical Psychiatric Hospital; Romania	maria.serbanescu@gmail.com	BOMA-ROMANIA	PMID: 31043756, 34002096, 26806518	specialised clinic	Employment status,Other (please provide details below)		590	DIGS	S-R, other		No	Lithium	European Ancestry	Yes	2
Melissa J. Green	School of Psychiatry, UNSW Sydney, Australia	melissa.green@unsw.edu.au	IGP (Imaging Genetics in Psychosis)	PMID: 25268788, 29923348, 27090803	community dwelling,specialised clinic,tertiary referral service	Other (please provide details below)		75	Other	HDRS, YMRS, S-R	BDRS	Yes - all participants	Comprehensive	European Ancestry: British	No
Bernhard Baune	University of Muenster	bernhard.baune@me.com	COFAMS	PMID: 31156485	community dwelling,specialised clinic	Employment status,Functioning Assessment Short Test (FAST),Marital status		150	MINI,SCID	HDRS, MADRS		Yes - subset	Comprehensive	European Ancestry	No	1
Zoltan Kovacs	Aalborg University Hospital, Denmark	zoko@rn.dk	Aalborg BD Cohort	N/A	specialised clinic,tertiary referral service	Functioning Assessment Short Test (FAST)			Clinical only	HDRS,other	MAS	No	Comprehensive	European Ancestry: Northern and Western European	No	>5
Francis J McMahon	National Institute of Mental Health	mcmahonf@mail.nih.gov	Amish Mennonite Bipolar Genetics (AMBiGen)	PMID: 39667704	community dwelling,primary hospital inpatients/outpatients,close relatives of ascertained cases	Employment status,Marital status,Other (please provide details below)		475	DIGS	YMRS, other	BDI, SCL90. MDQ	Yes - subset	Comprehensive	European Ancestry: Northern and Western European	Yes	2
Ingrid Melle	University of Oslo, Oslo, Norway	ingrid.melle@medisin.uio.no	TOP First Episode Longitudinal Study	PMIDs: 27814886, 26990158.	primary hospital inpatients/outpatients	Employment status,Marital status,World Health Organization Disability Assessment Scale (WHODAS)		101	SCID	YMRS, other	IDS-C	Yes - subset	Comprehensive	European Ancestry: Northern and Western European	Yes	3
Rafael Teixeira de Sousa	University of Sao Paulo, Laboratory of Neurosciences	Rafaelsousa88@gmail.com	Biomarkers in Bipolar	PMID: 25187825	community dwelling,Internet advertisement	Employment status,Marital status,Other (please provide details below)		79	MINI,SCID	HDRS, YMRS		Yes - subset	Comprehensive	European Ancestry: Toscani/Italian, Iberian/Spanish	Yes	1
Dan J. Stein	The University of Cape Town	dan.stein@uct.ac.za	Neuropsychiatric Genetics in African Populations - Psychosis (South Africa)	PMC 6377543	primary hospital inpatients/outpatients,specialised clinic,tertiary referral service	Employment status,Marital status		5791	MINI	other		No	Comprehensive	African Ancestry	No
Jorge Almeida	Dell Medical School / University of Texas at Austin	jorge.almeida@austin.utexas.edu	Austin Bipolar Study	NA	specialised clinic	Employment status,Functioning Assessment Short Test (FAST),Marital status,Sheehan Disability Scale (SDS),World Health Organization Disability Assessment Scale (WHODAS)		300	SCID	S-R, other		Yes - subset			Yes	3
Elisabet Vilella	Hospital Universitari Institut Pere Mata	vilellae@peremata.com	BIPOGENT-IPM	NA	primary hospital inpatients/outpatients	Employment status,Functioning Assessment Short Test (FAST),Marital status		172	SCID	HDRS, YMRS		Yes - all participants	Comprehensive	European Ancestry: Iberian/Spanish	No
John Nurnberger	Indiana University School of Medicine	jnurnber@iu.edu	BiGS (Bipolar Genomic Study)	PMID: 19488044	community dwelling,specialised clinic	Employment status,Marital status,Other (please provide details below)		2600	DIGS	other		No	Comprehensive	European Ancestry: British, Eastern European, Northern and Western European; Mexican American Ancestry; African Ancestry.	No
Narcis Cardoner	University Hospital Parc Tauli	ncardoner@tauli.cat	TAULI Cohort	PMIDs: 34252633, 33948693	primary hospital inpatients/outpatients	Employment status,Functioning Assessment Short Test (FAST),Marital status		59	SCID	HDRS, YMRS		Yes - all participants	Comprehensive	No Data	Yes	2
Edith Pomarol-Clotet	Edith Pomarol-Clotet	epomarol-clotet@fidmag.com	FIDMAG Cohort	PMID: 27448153, 30848539	community dwelling,primary hospital inpatients/outpatients,specialised clinic	Employment status,Functioning Assessment Short Test (FAST),Marital status,Other (please provide details below)		250	SCID	HDRS, MADRS, YMRS		Yes - all participants	Comprehensive	European Ancestry: Iberian/Spanish	Yes	>5
Lisa Jones	University of Worcester, UK	lisa.jones@worc.ac.uk	BDRN (Bipolar Disorder Research Network)	PMID: 30623825, 37437579	community dwelling,primary hospital inpatients/outpatients,specialised clinic	Employment status,Marital status,Other (please provide details below)		5000	Other	S-R, other	BDI, ASRM, QIDS	No	Comprehensive	European Ancestry: British	Yes	>5
Eline Regeer	inGeest Mental Health Care Inst, Amsterdam, the Netherlands	e.regeer@altrecht.nl	Dynamic Dutch Bipolar Cohort	NA	specialised clinic,tertiary referral service	Employment status,Functioning Assessment Short Test (FAST),Marital status,Other (please provide details below),World Health Organization Disability Assessment Scale (WHODAS)		200	MINI	S-R, other	QIDS-SR, ASRM, CGI-BP	Yes - subset	Comprehensive	European Ancestry: Northern and Western European	Yes	3
Annemiek Dols	Amsterdam UMC	a.dols@ggzingeest.nl	FUP	PMID: 24495405.	specialised clinic	Employment status,Functioning Assessment Short Test (FAST),Marital status		250	MINI	S-R, other	CES-D	Yes - subset	Comprehensive	European Ancestry: Northern and Western European	Yes	2
Eva Reininghaus	MEdical University of Graz	eva.reininghaus@medunigraz.at	BIPLONG	PMID: 24330408, 34829665	primary hospital inpatients/outpatients	Employment status,Marital status		600	SCID	HDRS, MADRS, YMRS		Yes - subset	Comprehensive	European Ancestry: Northern and Western European	Yes	>5
Beny Lafer	University of Sao Paulo	blafer@usp.br	USP Bipolar Research Program Cohort	PMID: 30419527	tertiary referral service	Employment status,Functioning Assessment Short Test (FAST),Marital status		250	SCID	HDRS, MADRS, YMRS		Yes - subset	Comprehensive	Other	Yes	1
Lana Williams	Deakin University	l.williams@deakin.edu.au	Bipolar Health and Lifestyle Study	PMID: 32051309	community dwelling	Employment status,Marital status, Global Assessment of Functioning		147	SCID	BDRS, YMRS		No	Comprehensive	Caucasian	No
Seetal Dodd	Deakin University	seetal.dodd@gmail.com	BCOS (Bipolar Comprehensive Outcomes Study)	PMID: 23244301	community dwelling	Social functioning was evaluated using the Streamlined Longitudinal Interview Clinical Evaluation from the Longitudinal Interval Follow-up Evaluation (SLICE/LIFE), and the Diagnostic Interview for Psychosis (DIP) was used to rate impairment in work, housework, and study.		239	DSM-IV-TR	CGI-BP, YMRS, HDRS		no	Comprehensive	Caucasian	Yes	9
Tamsyn Van Rheenen	University of Melbourne	tamsyn.van@unimelb.edu.au	COGSBD	PMID: 34232514	community dwelling	Employment status,Functioning Assessment Short Test (FAST),Marital status,Other (please provide details below)		60	MINI	MADRS, YMRS		Yes - all participants	Comprehensive	European Ancestry
Trine Vik Lagerberg	Oslo university hospital	t.v.lagerberg@medisin.uio.no	BIP-DPS	NA	specialised clinic	Employment status,Marital status,Other (please provide details below),World Health Organization Disability Assessment Scale (WHODAS)		40	SCID	YMRS, other	QIDS-C	Yes - all participants	Comprehensive	European Ancestry: Northern and Western European	Yes	>5
Dara Cannon	National University of Ireland Galway	dara.cannon@nuigalway.ie	CHRM2	PMID: 35046509	community dwelling,primary hospital inpatients/outpatients	Employment status		100	SCID	HDRS, MADRS, YMRS		Yes - all participants	Comprehensive	European Ancestry	Yes
Ronny Redlich	University of Halle, Germany	ronny.redlich@psych.uni-halle.de	NA	NA	community dwelling,primary hospital inpatients/outpatients	Employment status,Marital status,Other (please provide details below),World Health Organization Disability Assessment Scale (WHODAS)		200	SCID	HDRS, MADRS, YMRS	BDI, SHAPS	Yes - subset	Comprehensive	European Ancestry	Yes	2
Andrew McQuillin	University College London	a.mcquillin@ucl.ac.uk	UCL Bipolar Disorder Collection	PMID: 18317468, 34002096	primary hospital inpatients/outpatients	Employment status,Marital status		2200	Other	other		No	Comprehensive	European Ancestry: British	No
Azmeraw Amare	University of Adelaide	azmeraw.amare@adelaide.edu.au	NA	NA		None of the above			Other	othe		No
Si.V.Tourjman	Institut Universitaire en Sante Mentale de Montreal	vtourjman.iusmm@ssss.gouv.qc.ca	IUSMM Service ECT (preliminary name)	NA	tertiary referral service	Employment status,Marital status,World Health Organization Disability Assessment Scale (WHODAS)			Clinical only	HDRS, S-R		Yes - subset	Comprehensive	European Ancestry	No
Sarah Medland	Queensland Institute for Medical Research	sarahMe@qimr.edu.au	AGBD (Australian Genetics of Bipolar Study)	NA	community dwelling	Employment status,Marital status,Other (please provide details below)		5000	Other	S-R, MDQ, CIDI -SF, SPHERE12		No	Comprehensive	European Ancestry:British, Northern and Western European	No
Boris Chaumette	INSERM U1266, Institute of Psychiatry and Neuroscience of Paris (France)	boris.chaumette@inserm.fr	PsyDev	NA	specialised clinic	None of the above		150	DIGS	MADRS, YMRS		No	Comprehensive	European Ancestry: Northern and Western European	No
Henriette Raventos	Universidad de Costa Rica	henriette.raventos@ucr.ac.cr	Costa Rica Bipolar Cohort	PMID: 33975707	primary hospital inpatients/outpatients,proband from psychiatric hospital, and then on, other family members with and without BP, SC or psychosis	Employment status,Marital status,Other (please provide details below),World Health Organization Disability Assessment Scale (WHODAS)		96	DIGS	TEMPS-A	TEMPS-A	Yes - all participants	Comprehensive	American Ancestry: Hispanic	No
Jonathan Savitz	Laureate Institute for Brain Research	jsavitz@laureateinstitute.org	Tulsa	NA	community dwelling	Sheehan Disability Scale (SDS)			MINI,SCID	HDRS, MADRS, YMRS		No	Comprehensive	European Ancestry	No
BIJU VISWANATH	National Institute of Mental Health and Neurosciences (NIMHANS), Bangalore	bijuv1@gmail.com	NIMHANS	PMID: 33429328, 29636228, 25545603	tertiary referral service	Employment status,Marital status,Social Adjustment Scale (SAS)		400	DIGS,MINI	HDRS, YMRS		Yes - subset	Comprehensive	South Asian Ancestry: Bengali, Indian, Tamil, and Telugu.	Yes	2
Christopher Ching	University of Southern California; University of Southern California; University of Oslo	cching78@usc.edu	DOBI	PMID: 32725849	community dwelling,primary hospital inpatients/outpatients,specialised clinic	World Health Organization Disability Assessment Scale (WHODAS)			SCID	HDRS, MADRS, YMRS		Yes - subset	Comprehensive		Yes	2
Maria Skokou	Department of Psychiatry, General University Hospital of Patras	mskokou@upatras.gr	NeuroGAP (Neuropsychiatric Genetics in African Populations - Psychosis (South Africa)	NA	primary hospital inpatients/outpatients,tertiary referral service	Employment status,Functioning Assessment Short Test (FAST),Marital status		102	Clinical only,SCID	MADRS, YMRS		No	Comprehensive	European Ancestry	Yes
Andreas J. Forstner	Institute of Human Genetics, University of Bonn, Germany	forstner@uni-bonn.de	BOMA, FOR2107	PMID: 24618891, 30267149	primary hospital inpatients/outpatients,specialised clinic	Employment status,Functioning Assessment Short Test (FAST),World Health Organization Disability Assessment Scale (WHODAS)		970	SCID	HDRS, YMRS		Yes - subset	Comprehensive	European Ancestry: Iberian/Spanish, Eastern, Northern and Western European	Yes	2
Panagiotis Ferentinos	National and Kapodistrian University of Athens, Attikon University Hospital	pferentinos@med.uoa.gr	ATLADIS	PMID: 28647613	primary hospital inpatients/outpatients,specialised clinic,tertiary referral service	Employment status,Functioning Assessment Short Test (FAST),Marital status,Other (please provide details below)		275	MINI	HDRS, YMRS, other	CGI-S	Yes - subset	Comprehensive	European Ancestry	No
Mario F Juruena	IoPPN,King's College London	Mario.Juruena@kcl.ac.uk	MATS	PMID: 31704233	primary hospital inpatients/outpatients,specialised clinic,tertiary referral service	None of the above		142	MINI	HDRS, YMRS	BSS	Yes - all participants	Comprehensive	Other	Yes	3
Vina Goghari	University of Toronto	vina.goghari@utoronto.ca	Calgary Bipolar Sample	PMID: 34411810	community dwelling,specialised clinic	Employment status,Functioning Assessment Short Test (FAST),Marital status		25	SCID	HDRS, YMRS		Yes - all participants	Comprehensive	AMERICAN ANCESTRY (select sub-category below, if known)	No	1
Jair Soares	UTHealth Houston	jair.c.soares@uth.tmc.edu	UTHEALTH (Houston Bipolar Cohort)	NA	specialised clinic	Employment status,Functioning Assessment Short Test (FAST),Marital status,Sheehan Disability Scale (SDS),World Health Organization Disability Assessment Scale (WHODAS)		300	MINI	HDRS, MADRS, YMRS		Yes - subset	Comprehensive	American Ancestry: Brazil	Yes	2
Babak Najand	Vian Psychiatry Clinic	najand.babak@gmail.com	Vian Psychiatry Clinic Study	NA	specialised clinic	Employment status,Marital status			Clinical only,Other	S-R		Yes - subset	Comprehensive	Other
Claudio Toma	Universidad Autonoma de Madrid (UAM), Madrid, Spain	claudio.toma@cbm.csic.es	MadManic	NA	primary hospital inpatients/outpatients,specialised clinic	Employment status,Marital status,Other (please provide details below),World Health Organization Disability Assessment Scale (WHODAS)		400	Clinical only,Other	MADRS, YMRS	S-R	No	Comprehensive	European Ancestry: Iberian/Spanish	No
Janice Fullerton	Neuroscience Research Australia	j.fullerton@gmail.com	NeuRA 45&Up Study	NA	community dwelling	Employment status,Marital status,World Health Organization Disability Assessment Scale (WHODAS)		2041	Clinical only,Other	S-R		No	Comprehensive	European Ancestry	Yes	1
Evgeny Kasyanov	Bekhterev National Medical Research Center for Psychiatry and Neurology	Ohkasyan@yandex.ru	NA	NA	primary hospital inpatients/outpatients	Employment status,Marital status		110	MINI	MADRS ,other	HADS, TCI-125, CASES, SHAPS, HCL-32	Yes - subset	Comprehensive	European Ancestry: Eastern European	Yes	2
S.mehdi Samimi Ardestani	Shahid Beheshti University of Medical Sciences, Iran	mesamimi@yahoo.com	Functional Outcomes in Bipolar Disorder	NA	primary hospital inpatients/outpatients,specialised clinic,private office	Employment status,Marital status,Other (please provide details below)			Clinical only	S-R		No	Medication data not collected	Other	No
Martin Alda	Dalhousie University and Nova Scotia Health Authority	malda@dal.ca	Maritime Bipolar Registry	PMID: 31667829, 26576693	community dwelling,specialised clinic,tertiary referral service	Employment status,Marital status,GAF		500	DIGS,SCID, SADS-L	HDRS, YMRS		Yes - subset	Comprehensive	European Ancestry: British, Northern, and Western European	Yes
Philip Mitchell	University of New South Wales	phil.mitchell@unsw.edu.au	UNSW (Sydney Bipolar Disorders Clinic)	PMID: 19153918	specialised clinic	Social Adjustment Scale (SAS)		342	SCID	MADRS, YMRS, S-R	BDRS	No	Comprehensive	European Ancestry	No	1
Mark A. Frye MD	Mayo Clinic	mfrye@mayo.edu	Mayo Clinic Bipolar Biobank	PMID:26105627	primary hospital inpatients/outpatients,specialised clinic,tertiary referral service	Employment status,Marital status,World Health Organization Disability Assessment Scale (WHODAS)		2500	SCID	MADRS, YMRS		No	Comprehensive	European Ancestry	Yes	2
Jimmy Lee	Institute of Mental Health (Singapore)	jimmy_lee@imh.com.sg	IMH Bipolar Cohort	NA	primary hospital inpatients/outpatients,tertiary referral service	Employment, Education, SES status,SOFAS, Marital status, Education level		20	Other	BPI	BPI	Yes - all participants	Comprehensive	No Data	No	1
Heon-Jeong Lee	Korea University	leehjeong@korea.ac.kr	Asian Bipolar Genetics Network (A-BIG-NET)	NA	primary hospital inpatients/outpatients	None of the above		21500	SCID	other				East Asian and South Asian Ancestry
Thomas G. Schulze	Institute of Psychiatric Phenomics and Genomics, Munich, Germany	Thomas.Schulze@med.uni-muenchen.de	Pathomechanisms and Signatures in the Longitudinal Course of Psychosis (PsyCourse)	PMID: 30070057	primary hospital inpatients/outpatients	Employment status,Marital status,Other (please provide details below)		825	SCID	YMRS, IDSC 30, PANSS, BDI II		Yes - all participants	Comprehensive	European Ancestry: Northern and Western European	Yes	4
Thomas G. Schulze	University of Munich, Munich, Germany	thomas.schulze@med.uni-muenchen.de	Munich Mental Health Biobank	PMID: 35935431	tertiary referral service	Employment status,Marital status,Other (please provide details below)			Clinical only	S-R		No	Comprehensive	European Ancestry	No
Jun Chen	Shanghai Mental Health Center, China	doctorcj2010@gmail.com	Multimodal Pediction model for high-risk bipolar disorder: A Cohort Study	NA	community dwelling,specialised clinic,first-degree relatives of patients with bipolar disorder	Employment status,Marital status,World Health Organization Disability Assessment Scale (WHODAS)			MINI	HDRS, YMRS, S-R	HARS	Yes - subset		East Asian Ancestry: Han Chinese	Yes	3
Erika Saunders, MD	Penn State University Hershey	efs11@psu.edu	Penn State Psychiatry Clinical Rating and Evaluation System (PCARES) Bipolar Cohort	PMID: 34715185, 33169441	specialised clinic,both general psychiatry clinic and specialized mood disorder clinic	Marital status,World Health Organization Disability Assessment Scale (WHODAS)		487	Clinical only,MINI	S-R	PHQ-9, PROMIS, ASRM, GAD-7, MDQ	No	Comprehensive	European Ancestry	Yes	>5
Yun-Hsuan Chang	National Cheng Kung University, Taiwan	yh.chang.snoopy@gmail.com	NA	NA	community dwelling,primary hospital inpatients/outpatients,specialised clinic	Functioning Assessment Short Test (FAST)		94	Clinical only	HDRS, YMRS		Yes - all participants	Medication data not collected	East Asian Ancestry: Han Chinese	Yes	2
Alessandro Serretti	Faculty of Medicine and Surgery, University of Enna "Kore", 94100 Enna, Italy	alessandro.serretti@icloud.com	BP_Serretti	PMIDs: 27424200; 31043756; 30149091	specialised clinic,tertiary referral service	Employment status,Functioning Assessment Short Test (FAST),Marital status,Other (please provide details below)		228	SCID	HDRS, YMRS		Yes - subset	Comprehensive	European Ancestry: Iberian/Spanish	No
Emre Bora	Dokuz Eylul University, Izmir, Turkey	emre.bora@deu.edu.tr	Bora Turkish Cohorts	NA	primary hospital inpatients/outpatients	Employment status,Marital status,Other (please provide details below)		300	SCID	HDRS, YMRS		Yes - all participants	Comprehensive	Other	Yes	3
Alok Kulkarni	Manas Institute of Mental Health and Neurosciences	alokvkulkarni@gmail.com	India Bipolar Cohort (IBC)	NA	primary hospital inpatients/outpatients,specialised clinic	Other (please provide details below)		40	Clinical only	other	MADRS, YMRS, HDRS	No	Comprehensive	South Asian Ancestry: Indian	Yes	1
Melvin McInnis	University of Michigan	mmcinnis@med.umich.edu	Prechter Longitudinal Study of Bipolar Disorder	PMID: 29211851, 37541830	referral service	Best Esimtate Illness Impact > 2		1393	DIGS, SCID	HDRS, YMRS		Yes - subset	Comprehensive	European Ancestry
