# Supplementary material
Source: Research Square preprint supplement (doi:10.21203/rs.3.rs-9390347/v1)
Supplement: Supplementary file 5 [file ccf3672fe0066dc81f55197c.xlsx]

## Sheet: Supplemental_Table_2
Table S2: Summary cohort details from respondants to global survey of bipolar cohorts.
Principal investigator	Country	Region	Primary institution	Ancestry	total cohort N from Ancestry	Cognitive Data	Pharmaceutical Data	Genetic Data	Longitudinal Data (size)	Included Functional Analysis
Dan J. Stein	South Africa	Africa	The University of Cape Town, Cape Town	African	5791	No	Yes	No	No	Yes
Jun Chen	China	Asia	Shanghai Mental Health Center	South Asian		Yes - Subset	Yes	No	Yes	No
Biju Viswanath	India	Asia	National Institute of Mental Health and Neurosciences (NIMHANS), Bangalore	South Asian	300	Yes - Subset	Yes	No	Yes (n~150)	Yes
Alok Kulkarni	India	Asia	Manas Institute of Mental Health and Neurosciences	South Asian	40	No	Yes	No		No
Seyed Ardestani	Iran	Asia	Shahid Beheshti university of medical science,Imam Hossein Hospital, Behavioral science research center	Other		No	No	No	No	No
Heon-Jeong Lee	Korea, Pakistan, Taiwan, Singapore, India	Asia	Korea University	South Asian	21500	No	No	No		No
Jimmy Lee	Singapore	Asia	Institute of Mental Health (Singapore)	Unknown	300	Yes - All	Yes	No	No	No
Po-Hsiu Kuo	Taiwan	Asia	National Taiwan University, Taiwan	South Asian	900	Yes - Subset	Yes	Yes	Yes	Yes
Yun-Hsuan Chang	Taiwan	Asia	Institute of Gerontology, National Cheng Kung University, Taiwan	South Asian		Yes - All	No	No	Yes	No
Kürşat Altınbaş	Turkey	Asia	Selcuk University Faculty of Medicine, Konya, Turkey	European	340	Yes - Subset	Yes	No	Yes	Yes
Emre Bora	Turkey	Asia	Dokuz Eylul University, Izmir, Turkey	Other	300	Yes - All	Yes	No	Yes	No
Christian Simhandl	Austria	Europe	Bipolar Center Wiener Neustadt, Sigmund Freud PrivatUniversity, Vienna	European	300	No	Yes	No	Yes	No
Eva Reininghaus	Austria	Europe	Medical University of Graz	European	400	Yes - Subset	Yes	Yes	Yes (n~50)	Yes
Zoltan Kovacs	Denmark	Europe	Aalborg University Hospital, Aalborg, Denmark	European	150	No	Yes	No	No	No
Boris Chaumette	France	Europe	INSERM U1266, Institute of Psychiatry and Neuroscience of Paris (France)	European	150	No	Yes	Yes	No	No
Tilo Kircher	Germany	Europe	University of Marburg, Department of Psychiatry and Psychotherapy, Germany	European	150	Yes - All	Yes	Yes	Yes (n~788)	Yes
Bernhard Baune	Germany	Europe	University of M√É¬ºnster, Germany	European	150	Yes - Subset	Yes	Yes	No	Yes
Ronny Redlich	Germany	Europe	University of Halle, Germany	European	200	Yes - Subset	Yes	Yes	Yes	No
Andreas J. Forstner	Germany	Europe	Institute of Human Genetics, University of Bonn, Germany	European	970	Yes - Subset	Yes	Yes	Yes (n~300)	No
Thomas G. Schulze	Germany	Europe	Institute of Psychiatric Phenomics and Genomics (IPPG), LMU University Hospital, Munich, Germany	European	1320	Yes - All	Yes	Yes	Yes (n~788/661/589 at visits 2/3/4)	No
Thomas G. Schulze	Germany	Europe	University of Munich, Munich, Germany	European		No	Yes	Yes	No	No
Panagiotis Ferentinos	Greece	Europe	National and Kapodistrian University of Athens, Attikon University Hospital	European	275	Yes - Subset	Yes	Yes	No	Yes
Maria Skokou	Greece	Europe	Department of Psychiatry, General University Hospital of Patras	European	590	No	Yes	No	Yes	No
Dara Cannon	Ireland	Europe	National University of Ireland Galway	European	50	Yes - All	Yes	No	No	No
Mirko Manchia	Italy	Europe	University of Cagliari, Cagliari, Italy	European	200	Yes - All	Yes	Yes	Yes (n~50)	Yes
Alessandro Serretti	Italy	Europe	University of Enna "Kore", 94100 Enna, Italy	European	228	Yes - Subset	Yes	Yes	No	No
Eline Regeer	Netherlands	Europe	Altrecht Institute for Mental Health Care, Utrecht	European	200	Yes - Subset	Yes	No	Yes (n~150)	Yes
Annemiek Dols	Netherlands	Europe	Amsterdam UMC	European	250	Yes - Subset	Yes	No	Yes (n~200)	Yes
Ingrid Melle	Norway	Europe	University of Oslo, Oslo, Norway	European	101	Yes - Subset	Yes	Yes	Yes (n~60)	No
Trine Vik Lagerberg	Norway	Europe	Oslo university hospital	European	100	Yes - All	Yes	No	Yes (n~100)	No
Maria Grigoroiu-Serbanescu	Romania	Europe	Alexandru Obregia Clinical Psychiatric Hospital, Bucharest, Romania	European	590	No	Yes	Yes	Yes	No
Evgeny Kasyanov	Russia	Europe	Bekhterev National Medical Research Center for Psychiatry and Neurology	European	60	Yes - Subset	Yes	No	Yes (n~50)	No
Elisabet Vilella	Spain	Europe	Hospital Universitari Institut Pere Mata, Catalonia	European	172	Yes - All	Yes	Yes	No	Yes
Naris Cardoner	Spain	Europe	University Hospital Parc Tauli	Unknown	59	Yes - All	Yes	No	Yes (n~25)	Yes
Edith Pomarol-Clotet	Spain	Europe		European	250	Yes - All	Yes	Yes	Yes (n~50)	Yes
Claudio Toma	Spain	Europe	Universidad Autonoma de Madrid, Spain	European	600	No	Yes	Yes	No	Yes
Lisa Jones	UK	Europe	University of Worcester, UK | Cardiff University, UK	European	5000	No	Yes	Yes	Yes (n~1000)	Yes
Andrew McQuillin	UK	Europe	University College London	European	2200	No	Yes	Yes	No	No
Mario F Juruena	UK	Europe	IoPPN, King's College London	Other	142	Yes - All	Yes	Yes	Yes	No
Si.V.Tourjman	Canada	N. America	Institut Universitaire en Sant Mentale de Montreal	European		Yes - Subset	Yes	No	No	No
Vina Goghari	Canada	N. America	University of Toronto	American	25	Yes - All	Yes	No	No	No
Martin Alda	Canada	N. America	Dalhousie University and Nova Scotia Health Authority	European	500	Yes - Subset	Yes	Yes	Yes	Yes
Humberto Nicolini	Mexico	N. America	Carracci Medical Group	American	500	Yes - Subset	Yes	Yes	No	No
Jonathan Savitz	USA	N. America	Laureate Institute for Brain Research	European	60	No	Yes	No	No	No
John Nurnberger	USA	N. America	Indiana University School of Medicine, IND	European	2600	No	Yes	Yes	No	No
Jair Soares	USA	N. America	UTHealth Houston	American	423	Yes - Subset	Yes	Yes	Yes (n~100)	Yes
Francis J McMahon	USA	N. America	National Institute of Mental Health	European	475	Yes - Subset	Yes	Yes	Yes (n~50)	No
Maria	USA	N. America	Dell Medical School / University of Texas at Austin	Unknown	300	Yes - Subset	No	No	Yes (n~300)	No
Christopher Ching	USA	N. America	University of Southern California	Unknown		Yes - Subset	Yes	Yes	Yes (n~3500)	No
Babak Najand	USA	N. America	Vian Psychiatry Clinic	Other	18	Yes - Subset	Yes	No		No
Mark A. Frye	USA	N. America	Mayo Clinic	European	2500	No	Yes	Yes	Yes (n~100)	No
Erika Saunders	USA	N. America	Hershey Penn State University	European	487	No	Yes	No	Yes (n~225)	No
Melvin McInnis	USA	N. America	University of Michigan	Mixed	1393	Yes - Subset	Yes	Yes	Yes (n~1400)	No
Sarah Medland	Australia	Oceania	QIMR Berghofer Medical Research Institute, Brisbane	European	5000	No	Yes	Yes	No	Yes
Melissa J. Green	Australia	Oceania	School of Psychiatry, UNSW Sydney, Australia	European	75	Yes - All	Yes	Yes	No	Yes
Seetal Dodd	Australia	Oceania	Deakin University	Unknown	239	No	Yes	No	Yes (n~239)	Yes
Tamsyn Van Rheenen	Australia	Oceania	University of Melbourne	European	60	Yes - All	Yes	No		Yes
Janice Fullerton	Australia	Oceania	Neuroscience Research Australia, Sydney	European	2041	No	Yes	Yes	Yes (n~2000)	Yes
Lana Williams	Australia	Oceania	Deakin University	Unknown	147	No	Yes	No	No	No
Azmeraw Amare	Australia	Oceania	University of Adelaide	Unknown		No	No	No		No
Philip Mitchell	Australia	Oceania	University of New South Wales	European	342	No	Yes	Yes	No	Yes
Rafael Teixeira de Sousa	Brazil	S. America	University of Sao Paulo, Laboratory of Neurosciences	European	90	Yes - Subset	Yes	No	Yes (n~29)	No
Beny Lafer	Brazil	S. America	University of Sao Paulo	Other	250	Yes - Subset	Yes	No	Yes (n~50)	No
Miguel Prieto	Chile	S. America	Universidad de los Andes, Chile	American	130	Yes - Subset	Yes	Yes	No	No
Henriette Raventos	Costa Rica	S. America	Universidad de Costa Rica	American	96	Yes - All	Yes	Yes	No	No
